1 SEXUAL CONFLICT OVER SURVIVAL IN TRINIDADIAN GUPPIES  
2  
3 Yuying Lin<sup>1\*</sup>, Iulia Darolti<sup>1</sup>, Benjamin L. S. Furman<sup>1</sup>, Pedro Almeida<sup>2</sup>, Benjamin A. Sandkam<sup>1</sup>, Felix  
4 Breden<sup>3</sup>, Alison E. Wright<sup>4</sup>, Judith E. Mank<sup>1,2\*</sup>

5 1 Department of Zoology and Biodiversity Research Centre, University of British Columbia,  
6 Canada

7  
8 2 Department of Genetics, Evolution and Environment, University College London, United  
9 Kingdom

10  
11 3 Department of Biological Sciences, Simon Fraser University, Canada

12  
13 4 Department of Animal and Plant Sciences, University of Sheffield, United Kingdom

14  
15 **\*Corresponding author** E-mail: [linyuying@zoology.ubc.ca](mailto:linyuying@zoology.ubc.ca)

16

17

18

19

20

21

22

23

24

25

26

27

28

29 **ABSTRACT**

30 Sexual conflict over survival produces two distinct population genetic signatures. Fluctuating  
31 selection in males and females produces balancing selection. Additionally, at conception, allele  
32 frequencies are the same in males and females. However, loci with alleles that benefit the  
33 survival of one sex at some survival cost to the other should diverge over the course of a  
34 generation. We therefore expect that sexual conflict over survival would produce both  
35 signatures of allelic differentiation between the sexes and balancing selection. However, given  
36 the substantial mortality costs required to produce allelic differences between males and  
37 females, it remains unclear how many loci within the genome, if any at all, experience  
38 significant sexual conflict over survival. We assessed the genomes of 120 wild-caught guppies,  
39 which are expected to experience substantial predation- and pathogen-induced mortality. We  
40 identified a core list of 15 high confidence genes that show allelic differences between male  
41 and female adults. However, eight of these show evidence of having duplicated copies on the Y  
42 chromosome, suggesting that the male-specific region of the guppy Y chromosome may act as a  
43 hotspot for the resolution of conflict. We recovered just seven genes with significant male-  
44 female allelic differentiation without evidence of Y duplication, and these show elevated  
45 Tajima's  $D$ , consistent with balancing selection from sexual conflict. Only one of these seven  
46 genes, *Puf60b*, shows substantial intersexual  $F_{ST}$ . *Puf60b* has roles in cognition and the immune  
47 system, suggesting substantial ongoing, unresolved sexual conflict related to predator and  
48 pathogen avoidance strategies.

49

50

51

52

53

54

55

56 Intra-locus sexual conflict, where an allele increases the fitness of one sex at a cost to the other,  
57 leaves distinct genomic signatures (Mank 2017). All forms of intra-locus sexual conflict are  
58 expected to result in balancing selection, as alleles are selected for or against depending on  
59 whether they are present in males or females (Foerster et al. 2007; Johnston et al. 2013;  
60 Connallon and Clark 2014; Barson et al. 2015; Hawkes et al. 2016; Lonn et al. 2017; Ruzicka et  
61 al. 2019). Balancing selection resulting from sexual conflict may be a major factor in the  
62 maintenance of genetic polymorphisms within populations (Connallon and Clark 2014),  
63 therefore, the proportion of loci subject to unresolved sexual conflict within the genome, as  
64 well as the types of loci affected, may have important implications for a range of evolutionary  
65 factors, such as the speed and genetic basis of adaptation.

66 However, many factors can produce balancing selection in addition to sexual conflict, and a  
67 signature of balancing selection alone is not sufficient to identify conflict loci within the  
68 genome. Numerous recent studies have used allelic differences between males and females  
69 within a population ( $F_{ST}$ ,  $D_{xy}$ , etc) as a way to infer sex-differences in viability or survival, and  
70 therefore sexual conflict over mortality (Cheng and Kirkpatrick 2016; Lucotte et al. 2016;  
71 Flanagan and Jones 2017; Dutoit et al. 2018; Wright et al. 2018; Wright et al. 2019). This  
72 approach assumes that allele frequencies are the same in males and females at conception, but  
73 diverge over the course of a generation for loci with alleles that benefit the survival of one sex  
74 at some survival cost to the other. We would expect that sexual conflict over survival would  
75 produce both a signature of allelic differentiation between the sexes and balancing selection,  
76 and these two measures together offer a powerful approach to identify potentially sexually  
77 antagonistic loci within the genome.

78 Intra-locus conflict over survival implies a significant mortality cost each generation. Modelling  
79 and simulation methods (Bisseger et al. 2019; Kasimatis et al. 2019; Ruzicka et al. 2020)  
80 suggest that the sex-specific mortality rates necessary to generate significant allelic differences  
81 between the sexes within each generation are quite high for any one locus. This precludes the  
82 presence of large numbers of sites subject to sexual conflict due to survival, as the associated  
83 mortality load would simply be too great. Moreover, recent work has highlighted the potential  
84 that many perceived allelic sex differences actually are the result of sequencing homology

85 between autosomal and sex-linked loci (Bissegger et al. 2019; Kasimatis et al. 2019; Ruzicka et  
86 al. 2020). The Y chromosome may preferentially retain duplicates that play an important role in  
87 male development or fitness (Bachtrog 2013; Carvalho et al. 2015), and the process of Y  
88 duplication ironically offers a route to sexual conflict resolution even though it may lead to the  
89 mistaken perception of unresolved conflict acting on autosomal loci.

90 It therefore remains unclear how common and pervasive sexual conflict over survival is in  
91 natural populations, or what types of loci, if any, it is expected to target. Here we assess the  
92 potential for intersexual  $F_{ST}$  based on a sample of 120 wild-caught adult guppies, which would  
93 be expected to experience substantial predation- and pathogen-induced mortality. We  
94 identified a core list of 15 high confidence genes that show evidence of allelic differences  
95 between adult males and females. Of these, eight show evidence of Y duplicates, suggesting  
96 that the Y chromosome in guppies may indeed act as a hotspot for the resolution of conflict.  
97 We recovered just seven genes with evidence of male-female allelic differentiation without  
98 evidence of Y duplication, suggesting the number of loci subject to sex-specific mortality  
99 selection in wild guppies is relatively small. Importantly, these genes show elevated Tajima's  $D$ ,  
100 consistent with expectations for balancing selection due to sexual conflict. Six of the seven  
101 genes exhibit modest levels of allelic differentiation, and only one, *Puf60b*, shows  $F_{ST}$  levels  
102 consistent with high selection coefficients. Importantly, all high  $F_{ST}$  SNPs in this gene are  
103 localized within one exon. *Puf60b* is broadly expressed, and has both neurological and immune  
104 system functions (Low et al. 2017; Kew et al. 2020). This, in combination with the differences  
105 between female and male guppies in predation risk and predator avoidance (Magurran and  
106 Nowak 1991; Croft et al. 2006) as well as pathogen infection and avoidance (Stephenson et al.  
107 2015), suggests that sexual conflict over survival may primarily target loci that play a role in  
108 behavior, cognition and the immune system.

109

## 110 **Results**

111 We individually sequenced 60 male and 60 female wild-caught adults from three rivers in  
112 Trinidad to ~30X coverage in males and ~20X coverage in females after filtering, trimming and

113 quality control (see Materials and Methods for further details). The greater read depth in males  
114 was designed to aid detection of the Y chromosome, which is present in only one copy in each  
115 genome.

116 Because the size of the non-recombining region of the sex chromosome varies across guppy  
117 populations (Wright et al. 2017; Almeida et al. 2020), and sex chromosome divergence results  
118 in allelic differences on the X and Y between males and females, we confined all our analyses to  
119 autosomal sequence, although we present the X chromosome (Chromosome 12) here in figures  
120 for comparison. From our sequencing data, we obtained 8,054,872 biallelic high quality filtered  
121 autosomal SNPs. We further filtered these to 268,416 SNPs present in annotated autosomal  
122 coding sequence. We focused on coding sequence for three reasons. First, non-coding  
123 sequence is enriched for repetitive elements, and the accumulation of repetitive elements on  
124 the ancestral guppy Y chromosome (Almeida et al. 2020) would lead to male-specific SNPs in  
125 repetitive elements that could bias our estimates of Y duplications. Second, previous work has  
126 suggested that unresolved sexual conflict occurs primarily in coding sequence (Ruzicka et al.  
127 2019), and this fits with the substantial evidence that sexual conflict over gene regulation can  
128 be relatively quickly resolved through sex-specific gene regulation (Kopp et al. 2000; Mank  
129 2017; Wright et al. 2019). Finally, by focusing on functional coding sequence, we are able to  
130 determine the potential functional role of genes that are subject to sexual conflict.

### 131 ***Intersexual $F_{ST}$***

132 Due to the limited number of loci expected, and the low level of allelic divergence that is  
133 tolerable due to the required mortality loads (Kasimatis et al. 2019), it is critical to minimize  
134 false positives and to avoid potential genomic biases in allele frequency estimation. In order to  
135 reduce the possibility of false positives, we used three independent methods to estimate  
136 intersexual  $F_{ST}$ . We identified SNPs that were 1) in the top 1% of the autosomal  $F_{ST}$  distribution  
137 2) were significant after permutation testing of samples (1000 replicates,  $P < 0.001$ ) and 3)  
138 showed significant differences in male and female allele frequency based on Fisher's exact test  
139 ( $P < 0.001$ ) (Supplementary Fig. 1). We identified 504 autosomal coding sequence SNPs that  
140 were significant by all three of these measures (Supplementary Figs. 1 and 2), designated as  
141 high intersexual  $F_{ST}$  SNPs.

142 **Table 1.** Summary statistics of sexually differentiated genes. Those values that are statistically  
143 significant are in bold.

| Gene Name       | Chrom | Mean $F_{ST}^1$ | M:F read depth <sup>2</sup> | M:F SNP density <sup>2</sup> | Gene functions <sup>3</sup>                                                                       |
|-----------------|-------|-----------------|-----------------------------|------------------------------|---------------------------------------------------------------------------------------------------|
| Puf60b          | LG20  | <b>0.1386</b>   | 0.9759                      | 1.00                         | Poly-U binding factor, mutations result in neurological conditions                                |
| Spata6          | LG4   | <b>0.0645</b>   | 1.0186                      | 1.00                         | Spermiogenesis                                                                                    |
| Syngap1a        | LG11  | <b>0.0363</b>   | 1.0558                      | 1.00                         | development of cognition & proper synapse function                                                |
| MARK4           | LG13  | <b>0.0259</b>   | 1.0911                      | 1.00                         | microtubule organization in neuronal cells                                                        |
| ENSPREG13206    | LG11  | <b>0.0113</b>   | 0.9338                      | 1.00                         | N/A                                                                                               |
| ENSPREG21185    | LG2   | <b>0.0108</b>   | 0.9848                      | 1.00                         | N/A                                                                                               |
| ENSPREG12132    | LG2   | <b>0.0096</b>   | 1.0652                      | 1.00                         | N/A                                                                                               |
| Olr1496         | LG7   | <b>0.1802</b>   | <b>1.3854</b>               | 1.23                         | immune response & germline differentiation                                                        |
| Atat1           | LG11  | <b>0.1203</b>   | <b>1.1219</b>               | 1.00                         | sperm flagellar function, microtubules, neuronal migration and maturation, embryogenesis          |
| si:rp71-17i16.5 | LG7   | <b>0.0889</b>   | <b>1.1817</b>               | <b>3.35</b>                  | Phosphatidylinositol 3-kinase signalling, involved in immune, inflammatory and allergic responses |
| ENSPREG16391    | LG14  | <b>0.0462</b>   | <b>2.0197</b>               | 0.96                         | N/A                                                                                               |
| Fezf1           | LG6   | <b>0.0407</b>   | <b>1.5379</b>               | 1.01                         | Nervous system development, migration of gonadotropin-releasing hormone neurons                   |
| ENSPREG05754    | LG15  | <b>0.0244</b>   | <b>1.6949</b>               | 0.99                         | N/A                                                                                               |
| ENSPREG18780    | LG9   | <b>0.0236</b>   | <b>1.5771</b>               | 0.96                         | N/A                                                                                               |
| ENSPREG12441    | LG7   | <b>0.0176</b>   | <b>1.1185</b>               | 1.04                         | N/A                                                                                               |

144 1 Significance based on Wilcoxon's rank-sum test ( $P < 0.01$ ), compared to autosomal average.

145 2 Significance based on Fisher's Exact Test ( $P < 0.05$ ), relative to genome-wide M:F SNP density.

146 3 From Gene Ontology (Ashburner et al. 2000; Anon 2021) and Gene Cards (Stelzer et al. 2016).

147

148

149 To further reduce false positives, we identified autosomal coding sequence with  $\geq 5$  high  
150 intersexual  $F_{ST}$  SNPs (Tobler et al. 2017; Bisseger et al. 2019), resulting in 15 sexually  
151 differentiated genes. For each of the 15 sexually differentiated genes, average intersexual  $F_{ST}$   
152 significantly greater than the autosomal average (Table 1, Supplementary Fig. 3).

153 Estimates of intersexual  $F_{ST}$  and Tajima's D can be biased due to relatedness of individuals  
154 within groups. Although our sampling design was balanced, with 10 females and 10 males  
155 collected at two separate sites for each of three rivers across the island of Trinidad (see  
156 Almeida et al. 2020 for details), we could not account for relatedness in wild-caught samples.  
157 We therefore assessed pairwise kinship coefficients among all our samples using both KING  
158 (Manichaikul et al. 2010) and NgsRelate (Korneliussen and Moltke 2015), as implemented in  
159 ANGSD (Korneliussen et al. 2014). Neither method identified greater relatedness among male  
160 or female samples (Supplementary Fig. 4).

#### 161 ***Y duplications***

162 When mapping whole-genome data to a female reference genome, sequence similarity  
163 between the male-specific Y chromosome and the autosomes can lead to the perception of  
164 allelic differences between males and females. Recent work has shown that many genes  
165 with allelic sex differences are in fact autosomal loci that are either have recent Y duplicates  
166 (Bisseger et al. 2019; Mank et al. 2020) or otherwise display sequence homology to the Y  
167 (Kasimatis et al. 2020). We can use differences in M:F read depth to identify these genes (Hall  
168 et al. 2013). Duplication of the complete coding sequence for an autosomal gene on the Y  
169 chromosome would produce an average M:F read depth of 1.5 (three copies in males, two in  
170 females), and subsequent tandem duplications on the Y would result in M:F read depth  $> 1.5$ .  
171 Partial Y duplications, or a full duplication followed by significant differentiation, would result in  
172 average M:F read depth  $> 1$  and  $< 1.5$ .

173 Eight of our 15 sexually differentiated genes showed average M:F read depth significantly  $> 1$   
174 (Table 1, Supplemental Fig. 5) consistent with at least a partial duplication of the coding  
175 sequence on the Y chromosome. Four of our eight Y-duplicated genes have annotated function,

176 three of which (Olr1496, Atat1 and Fezf1) have a known role in sexual differentiation, and two  
177 (Olr1496 and si:rp71-17i16.5) with immune functions (Table 1).

178 Given sufficient evolutionary time, Y duplications will also accumulate male-specific SNPs  
179 (Tobler et al. 2017), leading to a signal of elevated M:F SNP density. Of the eight sexually  
180 differentiated genes with greater read depth in males, one showed significantly higher M:F SNP  
181 density (Table 1), suggesting it is older than the remaining seven Y duplicated genes. This high  
182 number of male-specific SNPs in this gene, si:rp71-17i16.5, accounts for the very high spike in  
183 significant  $F_{ST}$  at the proximal end of Chromosome 7 (Supplemental Fig. 1), illustrating the  
184 potential for duplications on the Y chromosome to affect M:F  $F_{ST}$  estimates of autosomal  
185 paralogs.

186 Across our 15 sexually differentiated genes, we did not observe evidence of duplications to the  
187 X chromosome, which would result in three copies in males and four in females and therefore  
188 an average M:F read depth of 0.75

### 189 ***Sexual conflict over survival for autosomal genes***

190 We identified seven sexually differentiated genes without evidence of Y duplication (Table 1),  
191 six of which displayed relatively modest levels of intersexual  $F_{ST}$ , (0.009-0.0645), consistent with  
192 the expectation that large numbers of high intersexual  $F_{ST}$  loci would require unsustainable  
193 levels of sex-specific mortality (Bissegger et al. 2019; Kasimatis et al. 2019; Ruzicka et al. 2020).  
194 Genes subject to ongoing sexual conflict are expected to experience balancing selection, which  
195 is often measured with Tajima's D (Cheng and Kirkpatrick 2016; Mank 2017; Wright et al. 2018;  
196 Bissegger et al. 2019). We compared Tajima's D for these seven genes to the autosomal  
197 average, as well as average Tajima's D for genes with known immune function, which are  
198 known to be subject to high levels of balancing selection (Ferrer-Admetlla et al. 2008; Andrés et  
199 al. 2009; Van Oosterhout 2009; Weedall and Conway 2010). Tajima's D for the seven sexually  
200 differentiated genes without evidence of Y duplicates is significantly higher than the autosomal  
201 average (Fig. 1), and is also significantly higher than that for immune genes. The combined  
202 signatures of both significantly elevated intersexual  $F_{ST}$  and Tajima's D are consistent with these  
203 genes experiencing sexual conflict over survival, with alleles benefiting the survival of one sex at  
204 a survival cost to the other (Mank 2017; Wright et al. 2018).



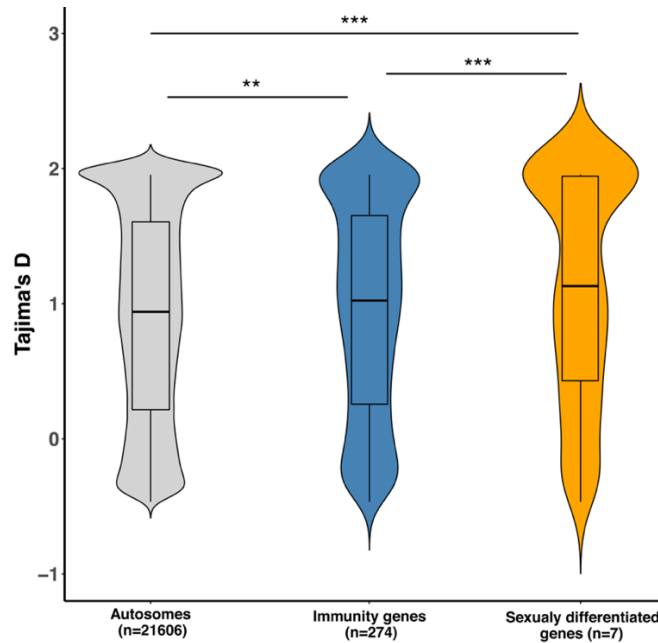

205

206 **Fig. 1.** Distribution of Tajima's D among autosomal genes, immunity genes, and seven sexually  
207 differentiated genes without significantly elevated M:F read depth. \* indicates pair-wise  
208 significantly elevated Tajima's D (Wilcoxon rank-sum test). \*P < 0.01, \*\*P < 0.001, \*\*\*P <  
209 0.0001

210

211 One of these genes, Puf60b, exhibits substantially higher M:F  $F_{ST}$  (0.1386). In order to  
212 understand the nature of sexual conflict at this locus, and to validate our results, we mapped  
213 our intersexual  $F_{ST}$  SNPs to this coding sequence, identifying 8 high  $F_{ST}$  SNPs, all localized in exon  
214 6 of this gene (Fig. 2A). We also verified the M:F read depth for these SNPs (Fig. 2B), which do  
215 not show elevated read depth in males and is therefore inconsistent with Y duplication. Of the  
216 eight high intersexual  $F_{ST}$  SNPs, seven are synonymous, and just one is non-synonymous (Fig.  
217 2A). The single non-synonymous SNP results in an amino acid change from aspartic acid to  
218 glutamic acid, two amino acids with broadly similar biochemical properties.

219 We also examined sex-differences in haplotype structure for this exon (Fig. 2C), recovering two  
220 major haplotypes. Haplotype 1 includes the non-synonymous SNP for aspartic acid (Asp), and  
221 Haplotype 2 contains the glutamic acid SNP (Glu). All rare haplotypes include Glu, and were  
222 included as Haplotype 2. There are significantly more Haplotype 1 homozygotes among females  
223 than expected, and Haplotype 1/Haplotype 2 heterozygotes are significantly under-represented  
224 ( $P < 0.008$  in both cases, based on  $\chi^2$ , 1.d.f, Fig. 2D, Supplementary Table 1). The relative

225 survival for female heterozygotes is 0.315 (Fig. 2D, Supplementary Table 2). In contrast, there  
 226 are significantly less Haplotype 1 homozygotes among males and significantly more Haplotype  
 227 1/Haplotype 2 heterozygotes ( $P < 0.0005$  in both cases,  $\chi^2$ , 1.d.f.). The relative inferred survival  
 228 for Haplotype 1 homozygotes in males is just 0.158. In both sexes, we observed no Haplotype 2  
 229 homozygotes, although this is marginally non-significant when assessing the sexes separately ( $P$   
 230 = 0.061,  $\chi^2$ , 1.d.f.), if we assume concordant selection against Haplotype 2 homozygotes, this  
 231 becomes significant ( $P = 0.008$ ,  $\chi^2$ , 1.d.f.) due to the increased sample size.

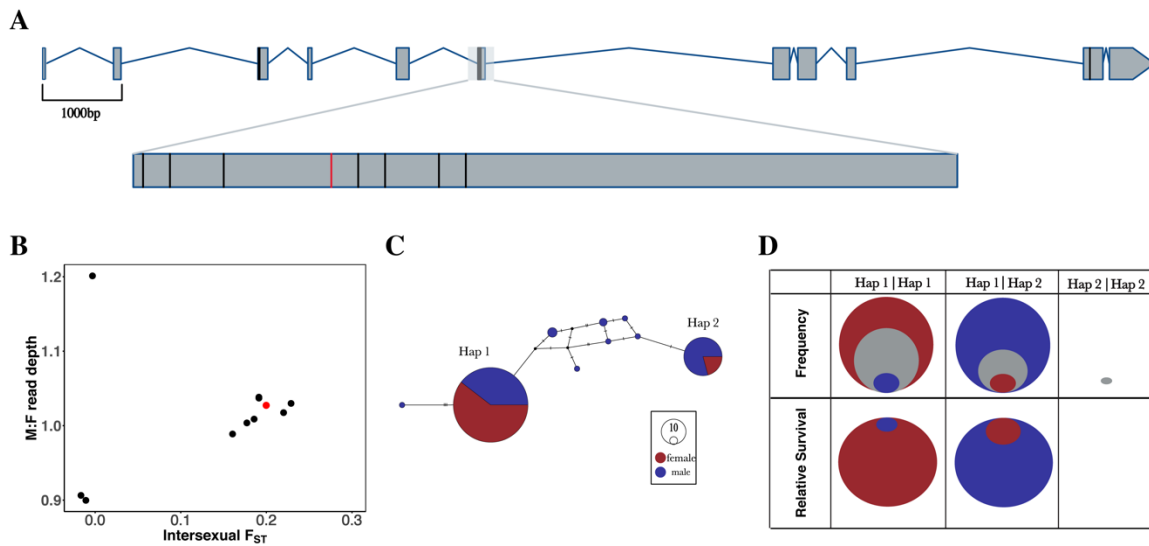

232  
 233 **Fig. 2.** (A) All high  $F_{ST}$  SNPs localize in Exon 6 of Puf60b. Gene structure shown, with exons (grey  
 234 boxes) and introns (blue lines). Within Exon 6, vertical black lines represent synonymous  
 235 mutations, vertical red line represents non-synonymous mutation (Asp→ Glu). (B)  $F_{ST}$  and M:F  
 236 read depth for all SNPs in Puf60b. Of 11 SNPs in Puf60b coding sequence, 8 high intersexual  
 237 SNPs do not show evidence of elevated M:F read depth. Synonymous SNPs in black, non-  
 238 synonymous SNP in red. (C) Haplotype network recovers two main haplotypes of Puf60b, with  
 239 Haplotype 1 includes the aspartic acid, and Haplotype 2 contains glutamic acid SNP variant.  
 240 Each circle represents one haplotype, and rare haplotypes all contain glutamic acid (Haplotype  
 241 2). The size of circle is proportion to the number of individuals belonging to that haplotype. Red  
 242 and blue of each circle represent the number of female and male individuals of each haplotype,  
 243 respectively. Bars show mutation steps between haplotypes. (D) Genotype frequencies and  
 244 relative survival for males (blue) and females (red), compared to expected (grey). See  
 245 Supplementary Tables 1 and 2 for further details.

246

247 In order to understand the mortality load these allele frequencies might impose, we calculated  
 248 the proportion of individuals of each sex that would be expected to be lost due to selection

249 over survival based on Pub60b genotypes (Fig. 2D, Supplementary Table 2). Selection at Pub60b  
250 would remove 39% of females and 54% of males at each generation. The frequencies of  
251 Haplotype 1 and Haplotype 2 did not differ between High and Low Predation populations  
252 (Supplementary Tables 3 and 4, Fisher's Exact Test,  $P = 0.36$ ).

253 We next assessed whether we observe the evidence of sexual conflict over survival in Puf60b in  
254 our lab population, which experiences no predation, as well as greatly reduced parasite load  
255 and pathogens due to our biosafety protocols. To do this, we identified the Puf60b coding  
256 sequence from previously collected RNA-Seq data for three families (Darolti et al. 2020).  
257 Haplotype 2 was not present in any of our lab samples. We also used this data to quantify  
258 expression in males and females, and found that Puf60b is expressed at a significantly higher  
259 level in males (Supplementary Fig. 6).

#### 260 **Functional annotations**

261 Of the seven genes without evidence of Y duplications, four of the seven genes have functional  
262 annotations in the *Danio rerio* Gene Ontology (Ashburner et al. 2000; Anon 2021) or GeneCards  
263 (Stelzer et al. 2016) databases. Three, Puf60b, Syngap1a and MARK4 have neurological  
264 functions (Table 1). Puf60b is broadly expressed, and has additional immunological functions  
265 (Kew et al. 2020).

266

#### 267 **Discussion**

268 Using a conservative approach, we identified 504 coding sequence SNPs in the guppy  
269 autosomal genome which showed significant differences in allele frequency between males and  
270 females. We used these to identify 15 autosomal genes with significant average intersexual  $F_{ST}$ .  
271 Our approach, based on the intersection of three statistical methods, reduces the likelihood of  
272 false positives and results in a high confidence gene list of intersexual  $F_{ST}$  (Table 1,  
273 Supplementary Figs. 1, 2, and 3). This list of genes can be used to assess the role of Y  
274 duplication in resolving conflict and driving intersexual  $F_{ST}$ , and the role of sex differences in  
275 mortality in sexual conflict of autosomal genes.

276 ***The Y chromosome in guppies as a locus for conflict resolution.***

277 Over half (8 out of 15) of our high-confidence sexually differentiated genes showed evidence of  
278 Y duplications based on elevated male-to-female read depth ratios (Table 1, Supplementary Fig.  
279 4). Four of these genes have sex-specific functions based on Gene Ontology and Gene Cards  
280 annotations, consistent with theory and empirical studies showing that Y chromosomes can  
281 accumulate gene duplicates with male-specific functions (Carvalho et al. 2015; Mahajan and  
282 Bachtrog 2017). Specifically, Olf1496 (Olfactory factor 1496-like gene) plays a role in multiple  
283 aspects of germline development in *C. elegans* (Cho et al. 2007), Atat1 (Alpha-tubulin N-  
284 acetyltransferase 1) plays a role in sperm flagellar functions (Yanai et al. 2020), and Fezf1 (FEZ  
285 Family Zink Finger 1) plays an important role in the migration of gonadotropin-releasing  
286 neurons (Damla Kotan et al. 2014).

287 Y chromosomes in general represent a unique genomic environment. Although Y chromosome  
288 gene content degrades quickly following recombination suppression (Bachtrog 2013), several  
289 recent studies indicate that older, large Y chromosomes, such as that in *Drosophila* (Koerich et  
290 al. 2008; Carvalho et al. 2015; Tobler et al. 2017), sticklebacks (Bissegger et al. 2019) and  
291 humans (Kasimatis et al. 2020), contain substantial numbers of genes duplicated from  
292 autosomes. Duplications may represent an important mechanism of sex chromosome  
293 divergence, and the Y chromosome may preferentially retain duplicates that play an important  
294 role in male development or fitness (Bachtrog 2013; Carvalho et al. 2015), offering a hotspot for  
295 sexual conflict resolution within the genome.

296 However, it remains unclear how common Y duplications of autosomal genes occur in younger  
297 systems with a far smaller male-specific region. Recent work has suggested that the ancestral  
298 non-recombining region of the Y chromosome in guppies is relatively small, spanning at most 5  
299 Mb (Darolti et al. 2019; Almeida et al. 2020). Others have failed to recover evidence for even  
300 this limited region of Y degeneration (Charlesworth et al. 2020; Fraser et al. 2020). Our findings  
301 add further support for a region of recombination suppression across populations on Trinidad,  
302 as only a male-specific region of the Y can explain the M:F read depth differences we observe.  
303 Moreover, our work suggests that the guppy Y chromosome is dynamic with regard to gene  
304 content, and acts as a hotspot for gene duplications with male-specific functions despite its

305 recent origin and small size. It is also possible that Y genes have duplicated to the autosomes,  
306 which would also produce a pattern of increased male read depth, although this is arguably less  
307 likely. Taken together, our work suggests that even homomorphic sex chromosomes may act as  
308 a hotspot of sexual conflict resolution. Moreover, our results further emphasize the importance  
309 of accounting for Y gene duplications in scans for M:F  $F_{ST}$ , as over half of our sexually  
310 differentiated genes show evidence of Y duplication, rather than sex-specific mortality, as the  
311 cause of allelic differences between the sexes.

312 These eight Y-duplicated genes are not present in our previous list of Y-linked genes based on  
313 male-specific sequence (Almeida et al. 2020), or in other similar analyses (Fraser et al. 2020).  
314 This is not surprising, as duplications, particularly if recent, will still retain substantial homology  
315 to the autosomal copy and will not be detected when bioinformatically identifying sequence  
316 that is unique to male genomes. Consistent with recent duplications and limited divergence,  
317 seven of our eight Y-duplicated genes do not exhibit elevated average M:F SNP density (Table  
318 1).

319 We have previously (Wright et al. 2018) noted evidence of intersexual  $F_{ST}$  in guppies (*Poecilia*  
320 *reticulata*). This finding was curious given that the data from this earlier work derived from a  
321 lab population, free of most of the pathogens and all the predators that would exacerbate sex-  
322 differences in mortality and predation (Wright et al. 2018). It was not clear how much of this  
323 signal, if any, was due to Y duplications. However, it is worth noting that elevated intersexual  
324  $F_{ST}$  was highest for genes with male-biased expression, as would be expected for genes with Y  
325 duplicates. We also did not observe a concomitant pattern of elevated Tajima's D for these  
326 genes, which is inconsistent with sexual conflict over survival.

### 327 ***Sexual conflict over survival targets neurological and immune functions***

328 Intra-locus sexual selection over survival or viability leads to allele frequency differences  
329 between the sexes over the course of a generation, as an allele increases the survival of one sex  
330 at a mortality cost to the other (Mank 2017; Wright et al. 2018; Kasimatis et al. 2019). The  
331 significant mortality costs required each generation to generate allele frequency differences  
332 between the sexes preclude large numbers of genes with significant M:F  $F_{ST}$  (Bissegger et al.

2019; Kasimatis et al. 2019; Ruzicka et al. 2020). At most, we might expect a limited number of loci with significant allelic differentiation between males and females, and this would be most evidence in wild species where males and females experience differences in predation, parasite or pathogen loads. Consistent with this, we observe just seven loci in the genome with high confidence evidence of sexual conflict over survival based on M:F  $F_{ST}$ . Additionally, these seven genes exhibit elevated levels of balancing selection (Fig. 1) as expected under sexual conflict over survival. Six of these seven genes have quite modest  $F_{ST}$  levels (ranging from 0.0096 to 0.0645).

Puf60b  $F_{ST}$  is substantially higher (0.1386), and requires a mortality load of 39% in females and 54% in males. Although high, it is worth noting that survival is significantly greater in females, which would allow for significant population growth despite the strong levels of selection. These results were similar for both High and Low Predation populations, and suggest similar selection coefficients across all populations in Trinidad. However, we did not detect Haplotype 2 in our lab colony, originally collected from the Quare River. This colony has been maintained in order to maximize genetic diversity, and it may be that the loss of predation, and the reduction in pathogen and parasite loads associated with our biosecurity protocols have eliminated sexual conflict and therefore the selection for heterozygotes in males. However, we also cannot rule out the possibility that Haplotype 2 has been lost due to genetic drift.

Recent work in salmon (Barson et al. 2015) has suggested that some sexually antagonistic loci experience sex-specific dominance effects. This reduces the mortality load associated with sexual conflict over survival. Our genotype data (Supplemental Tables 1 & 2) suggests that this is not the case for Puf60b, as male heterozygotes have the highest survival relative to both homozygous genotypes. This is inconsistent with sex-specific dominance.

Four of the seven fully autosomal sexually differentiated genes have cognitive or neurological functions. Puf60b (Poly(U) binding splicing factor 60) is related to RNA-binding, mRNA processing and RNA-splicing and mutations can result in neurological conditions (El Chehadeh et al. 2016). Syngap1 (Synaptic Ras GTPase-activating protein 1), encodes a Ras GTPase activating protein, regulating synaptic plasticity and neuronal homeostasis, and mutations affect forebrain and cognitive development (Ozkan et al. 2014). Mark4 (microtubule affinity

362 regulating kinase 4) has been shown to be involved in microtubule organization in neuronal  
363 cells (Trinczek et al. 2004). Puf60b has also been recently implicated as well in immune system  
364 functions (Kew et al. 2020).

365 At first it may seem counterintuitive that sexual conflict over survival would preferentially  
366 target neurological genes. However, in light of the differences between females and males in  
367 predation risk and predator avoidance (Magurran and Nowak 1991; Croft et al. 2006) as well as  
368 pathogen infection and avoidance (Stephenson et al. 2015). Our results suggest that sexual  
369 conflict over survival may primarily target genes that play a role in behavior, cognition and the  
370 immune system.

371

## 372 ***Concluding remarks***

373 We found profound sexual conflict over survival at one locus in the genome, Puf60b, and  
374 limited evidence at six additional loci in wild-caught guppy samples from across the island of  
375 Trinidad. Our results highlight the limited but important role of sexual conflict over survival in  
376 shaping patterns of genomic diversity. Additionally, we identified eight loci that have at least  
377 partial Y homology, indicating the potential of the guppy Y chromosome to act as a hotspot of  
378 sexual conflict resolution.

379

## 380 **Materials and Methods**

### 381 ***Data Collection and Genotyping***

382 Samples were collected from three rivers, Aripo, Yarra, Quare, in Trinidad in December 2016, in  
383 accordance with national collecting guidelines. In total, 10 males and 10 females were collected  
384 from one high predation and one low predation population in each river, resulting in 120  
385 samples, which were sequenced individually with Illumina HiSeqX. Further sequencing details  
386 are available in Almeida et al., (2020).

387 We used FastQC v0.11 ([www.bioinformatics.babraham.ac.uk/projects/fastqc](http://www.bioinformatics.babraham.ac.uk/projects/fastqc)) and  
388 Trimmomatic 0.36 (Bolger et al. 2014) to remove adapter sequences and low-quality reads.

389 After quality control, we recovered ~30X average sequencing depth for males and ~20X  
390 sequencing depth for females. High quality reads were aligned against the *Poecilia reticulata*  
391 female reference genome (Ensembl GCA\_000633615.2) (Künstner et al. 2016), using BWA-MEM  
392 (Li and Durbin 2009) with default parameters. We filled in mate coordinates and mate related  
393 flags, sorted alignment by coordinates, and marked PCR duplications with SAMtools-1.9 (Li et  
394 al. 2009).

395 We called genotypes across all the samples using the `mpileup` function from SAMtools-1.9  
396 with the following parameters: --min-MQ 20 --min-BQ 20 --skip-indels -a FORMAT/AD,  
397 FORMAT/DP. After genotyping, we used VCFtools v0.1.16 (Danecek et al. 2011) to exclude SNPs  
398 that had either : (1) genotype quality < 20; (2) sequencing depth <0.5x or >10x of average  
399 depth; (3) missing data in > 10% of individuals or (4) minor allele frequency < 0.05. In total, the  
400 autosomal filtered SNP dataset consisted of 8,054,872 biallelic SNPs. We extracted 268,416  
401 SNPs in annotated coding sequences (Ensembl build Guppy Female 1.0) for downstream  
402 analysis. Finally, we confined our analysis to autosomal genes, but included the X chromosome  
403 (Chromosome 12) in figures as a means of comparison.

#### 404 ***Intersexual $F_{ST}$***

405 In order to estimate intersexual allele frequency differences, we implemented Weir &  
406 Cockerham's estimator of  $F_{ST}$  (Weir and Cockerham 1984) between males and females using  
407 VCFtools v0.1.16 for each SNP in genome-wide coding sequence regions. We employed three  
408 methods jointly to identify SNPs exhibiting high  $F_{ST}$ . First, we used a cut-off method, retaining  
409 SNPs in only the top 1% of autosomal  $F_{ST}$  values. Second, we performed permutation tests by  
410 randomly assigning individuals to one of two groups to generate a null distribution of  $F_{ST}$  across  
411 the genome. We determined significance for each SNP from 1000 replicates, using a  $P < 0.001$   
412 threshold. Finally, we performed Fisher's exact test on SNPs to determine significance of allele  
413 frequency differences between males and females ( $P < 0.001$ ). We denoted SNPs that were  
414 significant in all three of these measures as high  $F_{ST}$  SNPs.

415 Using approaches to further limit false positives (Tobler et al. 2017; Bissegger et al. 2019), we  
416 identified 15 genes with  $\geq 5$  high intersexual  $F_{ST}$  SNPs, which we designated as sexually



417 differentiated genes. We calculated average intersexual  $F_{ST}$  for all genes using VCFtools v0.1.16,  
418 respectively. We used Wilcoxon rank-sum test to indicate statistical difference in intersexual  $F_{ST}$   
419 between autosomal genes and other categorical genes (sexually differentiated genes and genes  
420 on the sex chromosome).

#### 421 ***Haplotype network***

422 To further investigate allelic differences of Puf60b, we used SHAPEIT4 v4.2.0 (Delaneau et al.  
423 2019) with default parameters to phase all the samples. We then reconstructed the haplotype  
424 sequence of Puf60b for all samples. We used MEGAX (Kumar et al. 2018) for multiple sequence  
425 alignment, and the inferred haplotype network using PopART v1.7 (Leigh JW and Bryant D  
426 2015).

#### 427 ***Relatedness Inference***

428 In order to avoid biases in calculating intersexual allele frequency differences due to  
429 relatedness, we used KING (Manichaikul et al. 2010) to infer the pairwise degree of relatedness  
430 between individuals from estimated kinship coefficients. We first converted genotype data  
431 from the raw, unfiltered SNPs dataset to plink binary format using PLINK (Purcell et al. 2007). In  
432 order to avoid potential biases from KING software (Ramstetter et al. 2017) and validations, we  
433 also used NgsRelate (Korneliussen and Moltke 2015), implemented in ANGSD (Korneliussen et  
434 al. 2014) to infer genetic relatedness coefficients for each pair of individuals.

#### 435 ***Assessing Y duplications of sexually differentiated genes***

436 When using a female reference genome, reads from genes which have duplicates to the male-  
437 specific region of the Y chromosome will map back to original autosomal or X chromosome  
438 regions, resulting in elevated M:F coverage ratio (Bisseger et al. 2019; Mank et al. 2020). For  
439 example, if an autosomal gene has one Y duplication, we would expect three copies in males  
440 (two autosomal and one Y-linked) and two copies in females, and therefore an average M:F  
441 read depth of 1.5. We first calculated M:F read depth for each coding sequence SNP from  
442 genotype data, as male coverage/female coverage, correcting for differences in average  
443 genomic read depth between males and females.

444 Genes on the Y chromosome will accumulate male-specific mutations over time, leading to an  
445 increased number of male-specific mutations as well as elevated M:F SNP density (Bissegger et  
446 al. 2019; Mank et al. 2020). M:F SNP density for each gene was calculated as number of male  
447 SNPs /number of female SNPs.

448 In order to validate the M:F read depth ratio of sexually differentiated genes, we first extracted  
449 coding sequence of our 15 sexually differentiated genes. We then calculated male and female  
450 normalized read depth for each gene, based on male and female pooled reads. Additionally, we  
451 calculated M:F read depth from our pools for each high FST SNP identified in reads mapping to  
452 Puf60b.

### 453 ***Tajima's D***

454 Based on the filtered genotype data, we calculated Tajima's D for the coding sequence of all  
455 autosomal genes using VCFtools v1.19. We compared mean Tajima's D for autosomal genes  
456 (minus those with immune function), genes with immune function (defined following Wright et  
457 al. 2017, Wright et al. 2018), and our seven sexually differentiated genes.

### 458 ***Expression and diversity in lab colony***

459 We used the *Poecilia reticulata* RNA-Seq data from Darolti et al., (2020) to first determine  
460 differences in male and female expression for Puf60b. We first BLASTed the reference sequence  
461 for Puf60b against our *de novo* transcriptome (see Darolti et al. 2019 for details), and  
462 determined FPKM for male and female samples by mapping reads back to this contig. We also  
463 mapped reads back to the Ensembl reference genome to determine isoform variation, and  
464 examined this RNA-Seq data to determine whether we observe Haplotype 2 in our lab colony.

### 465 ***Functional Annotations***

466 The small number of sexually differentiated genes precludes Gene Ontology enrichment  
467 analysis. We therefore cataloged functional annotations from the Danio rerio Gene Ontology  
468 (Ashburner et al. 2000; Anon 2021) and Gene Cards (Stelzer et al. 2016).

469

470

471 **Acknowledgements**

472 This was funded by a Chinese Scholarship Council Doctoral Scholarship to YL (No.  
473 201906040216), a grant from the European Research Council (grant agreement 680951) and a  
474 Canada 150 Research Chair to JEM. We thank The Trinidad Ministry of Agriculture, Land and  
475 Fisheries and Indar Ramnarine for field permits. We thank Dolph Schluter for helpful  
476 discussions, and XXX for helpful comments and suggestions on the manuscript.

477

478 **References Cited:**

- 479 Almeida P, Sandkam BA, Morris J, Darolti I, Breden F, Mank JE. 2020. Divergence and  
480 Remarkable Diversity of the Y Chromosome in Guppies. *Mol. Biol. Evol.*:1–15.
- 481 Andrés AM, Hubisz MJ, Indap A, Torgerson DG, Degenhardt JD, Boyko AR, Gutenkunst RN,  
482 White TJ, Green ED, Bustamante CD, et al. 2009. Targets of balancing selection in the  
483 human genome. *Mol. Biol. Evol.*
- 484 Anon. 2021. The Gene Ontology resource: enriching a GOld mine. *Nucleic Acids Res.*
- 485 Ashburner M, Ball CA, Blake JA, Botstein D, Butler H, Cherry JM, Davis AP, Dolinski K,  
486 Dwight SS, Eppig JT, et al. 2000. Gene ontology: Tool for the unification of biology. *Nat.*  
487 *Genet.*
- 488 Bachtrog D. 2013. Y-chromosome evolution: Emerging insights into processes of Y-  
489 chromosome degeneration. *Nat. Rev. Genet.* 14:113–124.
- 490 Barson NJ, Aykanat T, Hindar K, Baranski M, Bolstad GH, Fiske P, Jacq C, Jensen AJ, Johnston  
491 SE, Karlsson S, et al. 2015. Sex-dependent dominance at a single locus maintains variation  
492 in age at maturity in salmon. *Nature* 528:405–408.
- 493 Bissegger M, Laurentino TG, Roesti M, Berner D. 2019. Widespread intersex differentiation  
494 across the stickleback genome – The signature of sexually antagonistic selection? *Mol.*  
495 *Ecol.*:1–10.
- 496 Bolger AM, Lohse M, Usadel B. 2014. Trimmomatic: A flexible trimmer for Illumina sequence  
497 data. *Bioinformatics* 30:2114–2120.
- 498 Carvalho AB, Vicoso B, Russo CAM, Swenor B, Clark AG. 2015. Birth of a new gene on the Y  
499 chromosome of *Drosophila melanogaster*. *Proc. Natl. Acad. Sci. U. S. A.*
- 500 Charlesworth D, Bergero R, Graham C, Gardner J, Yong L. 2020. Locating the sex determining  
501 region of linkage group 12 of guppy (*Poecilia reticulata*). *G3 Genes, Genomes, Genet.*
- 502 El Chehadeh S, Kerstjens-Frederikse WS, Thevenon J, Kuentz P, Bruel AL, Thauvin-Robinet C,  
503 Bensignor C, Dollfus H, Laugel V, Rivière JB, et al. 2016. Dominant variants in the  
504 splicing factor PUF60 cause a recognizable syndrome with intellectual disability, heart  
505 defects and short stature. In: *European Journal of Human Genetics.*
- 506 Cheng C, Kirkpatrick M. 2016. Sex-Specific Selection and Sex-Biased Gene Expression in  
507 Humans and Flies. *PLoS Genet.*
- 508 Cho S, Rogers KW, Fay DSS. 2007. The *C. elegans* Glycopeptide Hormone Receptor Ortholog,  
509 FSHR-1, Regulates Germline Differentiation and Survival. *Curr. Biol.*
- 510 Connallon T, Clark AG. 2014. Balancing selection in species with separate sexes: Insights from

- 511 fisher's geometric model. *Genetics*.
- 512 Croft DP, Morrell LJ, Wade AS, Piyapong C, Ioannou CC, Dyer JRG, Chapman BB, Wong Y,  
513 Krause J. 2006. Predation risk as a driving force for sexual segregation: A cross-population  
514 comparison. *Am. Nat.*
- 515 Damla Kotan L, Ian Hutchins B, Ozkan Y, Demirel F, Stoner H, Cheng PJ, Esen I, Gurbuz F,  
516 Kenan Bicakci Y, Mengen E, et al. 2014. Mutations in FEZF1 cause kallmann syndrome.  
517 *Am. J. Hum. Genet.*
- 518 Danecek P, Auton A, Abecasis G, Albers CA, Banks E, DePristo MA, Handsaker RE, Lunter G,  
519 Marth GT, Sherry ST, et al. 2011. The variant call format and VCFtools. *Bioinformatics*.
- 520 Darolti I, Wright AE, Mank JE. 2020. Guppy Y Chromosome Integrity Maintained by  
521 Incomplete Recombination Suppression. *Genome Biol. Evol.* 12:965–977.
- 522 Darolti I, Wright AE, Sandkam BA, Morris J, Bloch NI, Farré M, Fuller RC, Bourne GR, Larkin  
523 DM, Breden F, et al. 2019. Extreme heterogeneity in sex chromosome differentiation and  
524 dosage compensation in livebearers. *Proc. Natl. Acad. Sci. U. S. A.* 116:19031–19036.
- 525 Delaneau O, Zagury JF, Robinson MR, Marchini JL, Dermitzakis ET. 2019. Accurate, scalable  
526 and integrative haplotype estimation. *Nat. Commun.*
- 527 Dutoit L, Mugal CF, Bolívar P, Wang M, Nadachowska-Brzyska K, Smeds L, Yazdi HP,  
528 Gustafsson L, Ellegren H. 2018. Sex-biased gene expression, sexual antagonism and levels  
529 of genetic diversity in the collared flycatcher (*Ficedula albicollis*) genome. *Mol. Ecol.*
- 530 Ferrer-Admetlla A, Bosch E, Sikora M, Marqués-Bonet T, Ramírez-Soriano A, Muntasell A,  
531 Navarro A, Lazarus R, Calafell F, Bertranpetit J, et al. 2008. Balancing Selection Is the  
532 Main Force Shaping the Evolution of Innate Immunity Genes. *J. Immunol.*
- 533 Flanagan SP, Jones AG. 2017. Genome-wide selection components analysis in a fish with male  
534 pregnancy. *Evolution (N. Y.)*.
- 535 Foerster K, Coulson T, Sheldon BC, Pemberton JM, Clutton-Brock TH, Kruuk LEB. 2007.  
536 Sexually antagonistic genetic variation for fitness in red deer. *Nature*.
- 537 Fraser BA, Whiting JR, Paris JR, Weadick CJ, Parsons PJ, Charlesworth D, Bergero R, Bemm F,  
538 Hoffmann M, Kottler VA, et al. 2020. Improved Reference Genome Uncovers Novel Sex-  
539 Linked Regions in the Guppy (*Poecilia reticulata*). *Genome Biol. Evol.* 12:1789–1805.
- 540 Hall AB, Qi Y, Timoshevskiy V, Sharakhova M V., Sharakhov I V., Tu Z. 2013. Six novel Y  
541 chromosome genes in *Anopheles* mosquitoes discovered by independently sequencing  
542 males and females. *BMC Genomics*.
- 543 Hawkes MF, Gamble CE, Turner ECR, Carey MR, Wedell N, Hosken DJ. 2016. Intralocus  
544 sexual conflict and insecticide resistance. *Proc. R. Soc. B Biol. Sci.*
- 545 Johnston SE, Gratten J, Berenos C, Pilkington JG, Clutton-Brock TH, Pemberton JM, Slate J.  
546 2013. Life history trade-offs at a single locus maintain sexually selected genetic variation.  
547 *Nature*.
- 548 Kasimatis KR, Abraham A, Ralph PL, Kern AD, Capra JA, Phillips PC. 2020. Evaluating  
549 Human Autosomal Loci for Sexually Antagonistic Viability Selection in Two Large  
550 Biobanks. *Genetics*.
- 551 Kasimatis KR, Ralph PL, Phillips PC. 2019. Limits to genomic divergence under sexually  
552 antagonistic selection. *G3 Genes, Genomes, Genet.* 9:3813–3824.
- 553 Kew C, Huang W, Fischer J, Ganesan R, Robinson N, Antebi A. 2020. Evolutionarily conserved  
554 regulation of immunity by the splicing factor RNP-6/PUF60. *Elife* 9:1–23.
- 555 Koerich LB, Wang X, Clark AG, Carvalho AB. 2008. Low conservation of gene content in the  
556 *Drosophila* Y chromosome. *Nature*.

- 557 Kopp A, Duncan I, Carroll SB. 2000. Genetic control and evolution of sexually dimorphic  
558 characters in *Drosophila*. *Nature*.
- 559 Korneliussen TS, Albrechtsen A, Nielsen R. 2014. ANGSD: Analysis of Next Generation  
560 Sequencing Data. *BMC Bioinformatics* 15:1–13.
- 561 Korneliussen TS, Moltke I. 2015. NgsRelate: A software tool for estimating pairwise relatedness  
562 from next-generation sequencing data. *Bioinformatics*.
- 563 Kumar S, Stecher G, Li M, Knyaz C, Tamura K. 2018. MEGA X: Molecular evolutionary  
564 genetics analysis across computing platforms. *Mol. Biol. Evol.*
- 565 Künstner A, Hoffmann M, Fraser BA, Kottler VA, Sharma E, Weigel D, Dreyer C. 2016. The  
566 genome of the trinidadian guppy, *Poecilia reticulata*, and variation in the Guanapo  
567 population. *PLoS One* 11:1–25.
- 568 Leigh JW, Bryant D. 2015. POPART: full-featured software for haplotype network construction.  
569 *Methods Ecol. Evol.*
- 570 Li H, Durbin R. 2009. Fast and accurate short read alignment with Burrows-Wheeler transform.  
571 *Bioinformatics*.
- 572 Li H, Handsaker B, Wysoker A, Fennell T, Ruan J, Homer N, Marth G, Abecasis G, Durbin R.  
573 2009. The Sequence Alignment/Map format and SAMtools. *Bioinformatics*.
- 574 Lonn E, Koskela E, Mappes T, Mokkonen M, Sims AM, Watts PC. 2017. Balancing selection  
575 maintains polymorphisms at neurogenetic loci in field experiments. *Proc. Natl. Acad. Sci.*  
576 *U. S. A.*
- 577 Low KJ, Ansari M, Abou Jamra R, Clarke A, El Chehadeh S, Fitzpatrick DR, Greenslade M,  
578 Henderson A, Hurst J, Keller K, et al. 2017. PUF60 variants cause a syndrome of ID, short  
579 stature, microcephaly, coloboma, craniofacial, cardiac, renal and spinal features. *Eur. J.*  
580 *Hum. Genet.*
- 581 Lucotte EA, Laurent R, Heyer E, Ségurel L, Toupance B. 2016. Detection of allelic frequency  
582 differences between the sexes in humans: A signature of sexually antagonistic selection.  
583 *Genome Biol. Evol.* 8:1489–1500.
- 584 Magurran AE, Nowak MA. 1991. Another battle of the sexes: The consequences of sexual  
585 asymmetry in mating costs and predation risk in the guppy, *Poecilia reticulata*. *Proc. R. Soc.*  
586 *B Biol. Sci.*
- 587 Mahajan S, Bachtrog D. 2017. Convergent evolution of y chromosome gene content in flies. *Nat.*  
588 *Commun.* 8
- 589 Manichaikul A, Mychaleckyj JC, Rich SS, Daly K, Sale M, Chen WM. 2010. Robust  
590 relationship inference in genome-wide association studies. *Bioinformatics*.
- 591 Mank JE. 2017. Population genetics of sexual conflict in the genomic era. *Nat. Rev. Genet.*  
592 18:721–730.
- 593 Mank JE, Shu JJ, Wright AE. 2020. Signature of sexual conflict is actually conflict resolved.  
594 *Mol. Ecol.*
- 595 Van Oosterhout C. 2009. A new theory of MHC evolution: Beyond selection on the immune  
596 genes. *Proc. R. Soc. B Biol. Sci.*
- 597 Ozkan ED, Creson TK, Kramár EA, Rojas C, Seese RR, Babyan AH, Shi Y, Lucero R, Xu X,  
598 Noebels JL, et al. 2014. Reduced cognition in *Syngap1* mutants is caused by isolated  
599 damage within developing forebrain excitatory neurons. *Neuron*.
- 600 Purcell S, Neale B, Todd-Brown K, Thomas L, Ferreira MAR, Bender D, Maller J, Sklar P, De  
601 Bakker PIW, Daly MJ, et al. 2007. PLINK: A tool set for whole-genome association and  
602 population-based linkage analyses. *Am. J. Hum. Genet.*

- 603 Ramstetter MD, Dyer TD, Lehman DM, Curran JE, Duggirala R, Blangero J, Mezey JG,  
604 Williams AL. 2017. Benchmarking relatedness inference methods with genome-wide data  
605 from thousands of relatives. *Genetics*.
- 606 Ruzicka F, Dutoit L, Czuppon P, Jordan CY, Li X, Olito C, Runemark A, Svensson EI, Yazdi  
607 HP, Connallon T. 2020. The search for sexually antagonistic genes: Practical insights from  
608 studies of local adaptation and statistical genomics. *Evol. Lett.* 4:398–415.
- 609 Ruzicka F, Hill MS, Pennell TM, Flis I, Ingleby FC, Mott R, Fowler K, Morrow EH, Reuter M.  
610 2019. Genome-wide sexually antagonistic variants reveal long-standing constraints on  
611 sexual dimorphism in fruit flies.
- 612 Stelzer G, Rosen N, Plaschkes I, Zimmerman S, Twik M, Fishilevich S, Iny Stein T, Nudel R,  
613 Lieder I, Mazor Y, et al. 2016. The GeneCards suite: From gene data mining to disease  
614 genome sequence analyses. *Curr. Protoc. Bioinforma.*
- 615 Stephenson JF, Van Oosterhout C, Mohammed RS, Cable J. 2015. Parasites of Trinidadian  
616 guppies: Evidence for sex- and age-specific trait-mediated indirect effects of predators.  
617 *Ecology*.
- 618 Tobler R, Nolte V, Schlötterer C. 2017. High rate of translocation-based gene birth on the  
619 *Drosophila* Y chromosome. *Proc. Natl. Acad. Sci. U. S. A.* 114:11721–11726.
- 620 Trinczek B, Brajenovic M, Ebneith A, Drewes G. 2004. MARK4 Is a Novel Microtubule-  
621 associated Proteins/Microtubule Affinity-regulating Kinase That Binds to the Cellular  
622 Microtubule Network and to Centrosomes. *J. Biol. Chem.*
- 623 Weedall GD, Conway DJ. 2010. Detecting signatures of balancing selection to identify targets of  
624 anti-parasite immunity. *Trends Parasitol.*
- 625 Weir BS, Cockerham CC. 1984. Estimating F-statistics for the analysis of population structure.  
626 *Evolution (N. Y.)*.
- 627 Wright AE, Darolti I, Bloch NI, Oostra V, Sandkam B, Buechel SD, Kolm N, Breden F, Vicoso  
628 B, Mank JE. 2017. Convergent recombination suppression suggests role of sexual selection  
629 in guppy sex chromosome formation. *Nat. Commun.* 8.
- 630 Wright AE, Fumagalli M, Cooney CR, Bloch NI, Vieira FG, Buechel SD, Kolm N, Mank JE.  
631 2018. Male-biased gene expression resolves sexual conflict through the evolution of sex-  
632 specific genetic architecture. *Evol. Lett.* 2:52–61.
- 633 Wright AE, Rogers TF, Fumagalli M, Cooney CR, Mank JE. 2019. Phenotypic sexual  
634 dimorphism is associated with genomic signatures of resolved sexual conflict. *Mol. Ecol.*
- 635 Yanai R, Yamashita Y, Umezu K, Hiradate Y, Hara K, Tanemura K. 2020. Expression and  
636 localization of alpha-tubulin N-acetyltransferase 1 in the reproductive system of male mice.  
637 *J. Reprod. Dev*
- 638
